# Supplementary material for: Preparation of a double-network hydrogel based on wastepaper and its application in the treatment of wastewater containing copper(ii) and methylene blue
Source: Royal Society of Chemistry journal article supplement (doi:10.1039/d1ra02321g), 2021-01-01
Supplement: d1ra02321g1.pdf [file d1ra02321g1.pdf]

## Supporting Information

### **Preparation of a double-network hydrogel based on wastepaper and its application in the treatment of wastewater containing copper (II) and methylene blue**

Yaoning Chen<sup>a,b\*,1</sup>, Linshenzhang Li<sup>a,b,1</sup>, Yuanping Li<sup>c\*,1</sup>, Yihuan Liu<sup>a,b</sup>, Yanrong Chen<sup>a,b</sup>,  
Hui Li<sup>d</sup>, Meiling Li<sup>a,b</sup>, Fangting Xu<sup>a,b</sup>, Yuqing Liu<sup>e</sup>

<sup>a</sup> College of Environmental Science and Engineering, Hunan University, Changsha 410082, China

<sup>b</sup> Key Laboratory of Environmental Biology and Pollution Control (Hunan University), Ministry of Education, Changsha 410082, China

<sup>c</sup> College of Municipal and Mapping Engineering, Hunan City University, Yiyang, Hunan 413000, China

<sup>d</sup> State key laboratory of utilization of woody oil resource, Hunan Academy of Forestry, Changsha 410004, P.R. China

<sup>e</sup> Shenzhen Zhongrun Zhihuan Ecological Environment Technology Co., Ltd, Shenzhen 518000. China

\* Corresponding authors. Address: College of Environmental Science and Engineering, Hunan University, Changsha 410082, China. Tel.: +86 731 88821413; Fax: +86 731 88821413. E-mail addresses: cyn@hnu.edu.cn (Y.N. Chen) and yuanpingl@163.net (Y.P. Li).

<sup>1</sup> These authors contribute equally to this article.

**Text S1: Cost analysis.**

The price parameters were derived from Sinopharm Chemical Reagent Co, Ltd. (China).

The chemicals used in the experiment were shown below: urea (AR, £ 32.84/t), sodium hydroxide (NaOH, AR, £ 26.14/t), acrylamide (AM, AR, £ 88.07/t), epichlorohydrin (ECH, AR, £ 35.39/L), potassium persulfate (KPS, AR, £ 982.03/t), tetramethylethylenediamine (TEMED, AR, £ 1201.74/L), N, N-methylenebisacrylamide (MBA, AR, £ 1118.55/t), etc. According to the synthetic ratio, the preparation of 1 t WP/PAM required 0.3 L ECH, 1.75 t NaOH, 3 t urea, 1 t AM, 0.0484 t MBA, 0.0272 t KPS, and 0.1 L TEMED. Without considering other factors (e.g., electricity, labor and machine maintenance costs) the production cost of the material was about £ 444/t.

**Text S2: Measurement of isoelectric point ( $pH_{PZC}$ ) by the  $\Delta pH$  drift method:**

The WP/PAM were added to a series of 0.01 mol/L NaCl solutions of different initial pH (1-10). After shaking at 170 rpm for 24 h at 25°C, the pH of the supernatant was measured and the pH change before and after the reaction ( $\Delta pH$ ) was calculated. The initial pH corresponding to when  $\Delta pH = 0$  was defined as the zero charge point of the material ( $pH_{PZC}$ ).

**Text S3: Specific surface area analysis.**

As could be seen from Table S1, the specific surface area of the WP/PAM was 52.1380 m<sup>2</sup>/g. It was probably due to the fact that the specific surface area data was obtained by measuring the adsorption and desorption process of N<sub>2</sub> by a BET instrument. N<sub>2</sub> is a neutral molecule, and the adsorption process of N<sub>2</sub> belongs to physical adsorption. The relatively small specific surface area of the hydrogel was due to the small amount of N<sub>2</sub> adsorbed by the WP/PAM, indicating a small physical adsorption occupancy in the hydrogel adsorption process.<sup>1</sup>

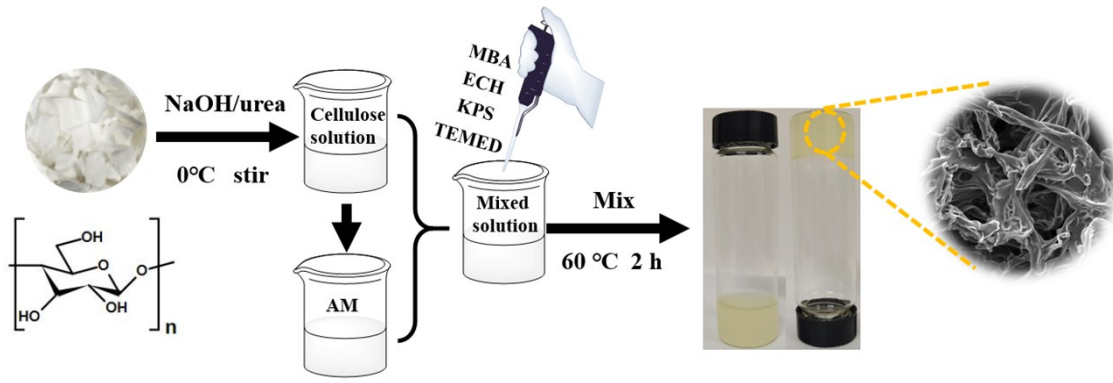

**Fig. S1.** The preparation process of the WP/PAM.

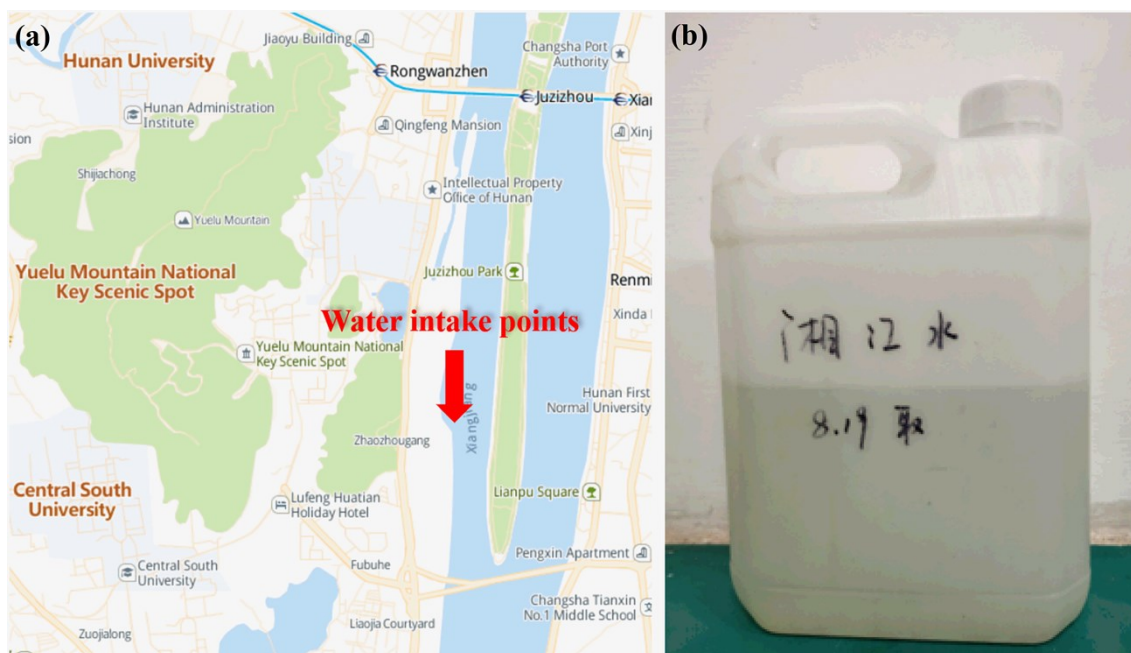

**Fig. S2.** Sampling site of Xiangjiang river water (Changsha, Hunan province, China, August 19<sup>th</sup>, 2020. North latitude: 28°17'4", East longitude: 112°95'65").

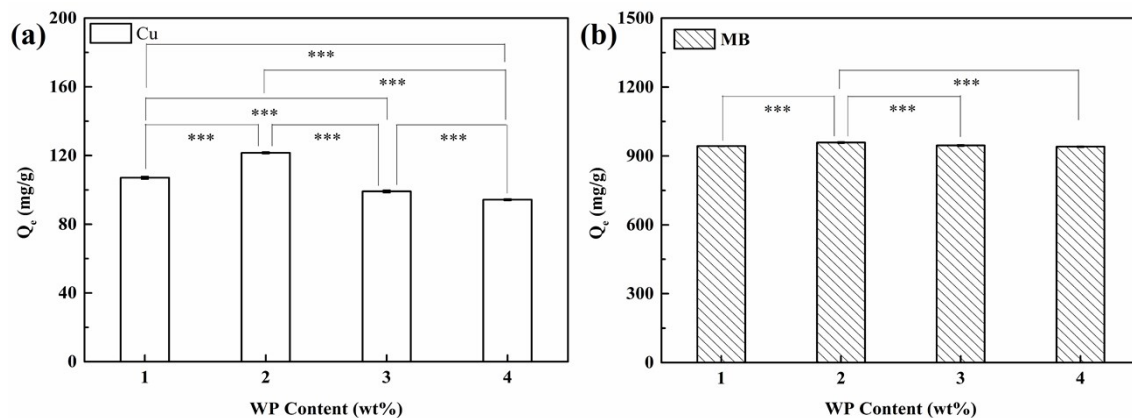

**Fig. S3.** Effect of WP content on (a) Cu (II) removal and (b) MB removal by the WP/PAM. (\*\*\*) indicated a significant difference between the two groups, P value<0.001; no labeling indicated no significant difference between the two groups) (Dosage: 0.5 g/L;  $C_{0(\text{Cu (II)})}$ : 100 mg/L,  $C_{0(\text{MB})}$ : 500 mg/L; 180 min; Temperature: 25°C).

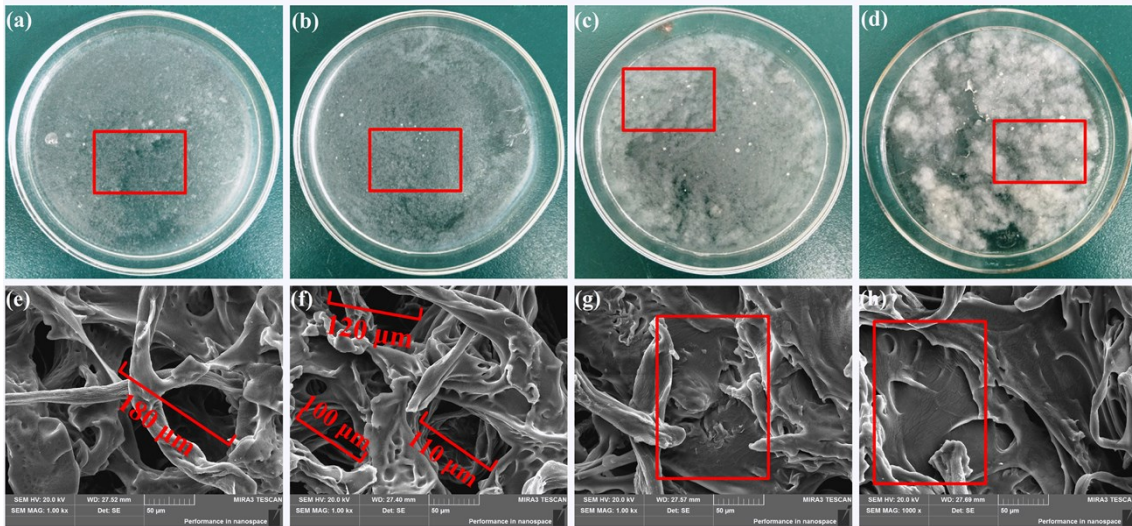

**Fig. S4.** Photos of (a) 1 wt%, (b) 2 wt%, (c) 3 wt%, (d) 4 wt% WP/PAM and SEM images of (e) 1 wt%, (f) 2 wt%, (g) 3 wt%, (h) 4 wt% WP/PAM.



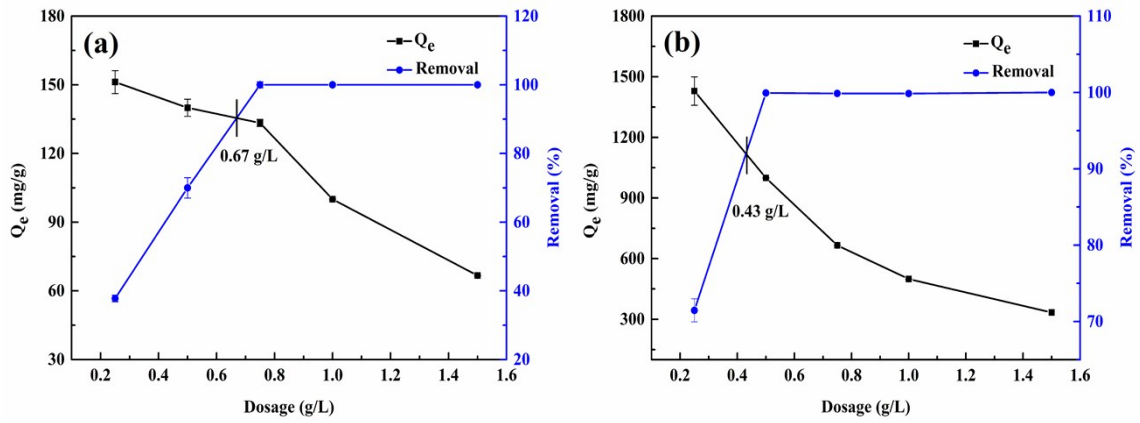

**Fig. S5.** Effect of adsorbent dosage. ( $C_{0(\text{Cu}(\text{II}))}$ : 100 mg/L,  $C_{0(\text{MB})}$ : 500 mg/L; 180 min; Temperature: 25°C).

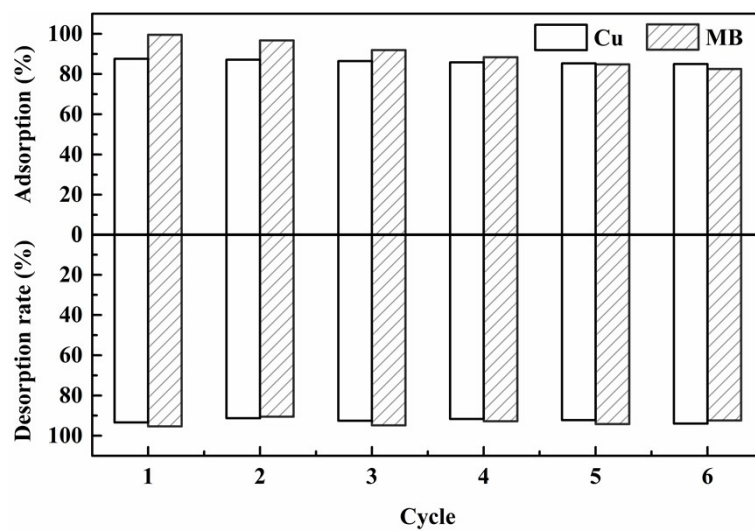

**Fig. S6.** Regeneration and readsorption of the WP/PAM within 6 cycles. (Dosage<sub>(Cu (II))</sub>: 0.7 g/L, Dosage<sub>(MB)</sub>: 0.4 g/L; C<sub>0(Cu (II))</sub>: 100 mg/L, C<sub>0(MB)</sub>: 600 mg/L; 180 min; Temperature: 25°C).

**Table S1** the porosity of the WP/PAM with different WP content

|              | 1 wt% WP/PAM | 2 wt% WP/PAM | 3 wt% WP/PAM | 4 wt% WP/PAM |
|--------------|--------------|--------------|--------------|--------------|
| Porosity (%) | 97.5         | 98.1         | 92.7         | 88.5         |

**Table S2** Specific surface area and porous ratio of the WP/PAM

| WP/PAM                                    |         |
|-------------------------------------------|---------|
| Specific surface Area (m <sup>2</sup> /g) | 52.1380 |
| porous ratio (cm <sup>3</sup> /g)         | 0.02179 |

**Table S3** the comparison of the WP/PAM performance before and after storage

| Adsorbent                     | $Q_e$ (mg/g) |        |
|-------------------------------|--------------|--------|
|                               | Cu (II)      | MB     |
| WP/PAM                        | 132.2        | 1653.6 |
| WP/PAM stored after 16 months | 131.0        | 1630.8 |

**Table S4** Desorption data of Cu (II) and MB by WP/PAM in 6 cycles

| Cycles | Cu (II)         |                        | MB              |                        |
|--------|-----------------|------------------------|-----------------|------------------------|
|        | $Q_d$<br>(mg/g) | Desorption Rate<br>(%) | $Q_d$<br>(mg/g) | Desorption Rate<br>(%) |
| 0      | $Q_e = 139.5$   | -                      | $Q_e = 1705.5$  | -                      |
| 1      | 130.3           | 93.4                   | 1626.9          | 95.4                   |
| 2      | 119.0           | 91.3                   | 1473.4          | 90.6                   |
| 3      | 110.1           | 92.5                   | 1398.0          | 94.9                   |
| 4      | 101.0           | 91.7                   | 1298.2          | 92.9                   |
| 5      | 93.1            | 92.2                   | 1222.9          | 94.2                   |
| 6      | 87.5            | 94.00                  | 1130.8          | 92.5                   |

## References

- 1 S. Tian, Q. Liu, J. Sun, M. Zhu, S. Wu and X. Zhao, *J. Colloid Interface Sci.*, 2019, **534**, 389-398.
